# Supplementary material for: Methuosis Contributes to Jaspine-B-Induced Cell Death
Source: MDPI journal article supplement (doi:10.3390/ijms23137257), 2022-06-29
Supplement: s1 [file s1]

## Supplementary Materials

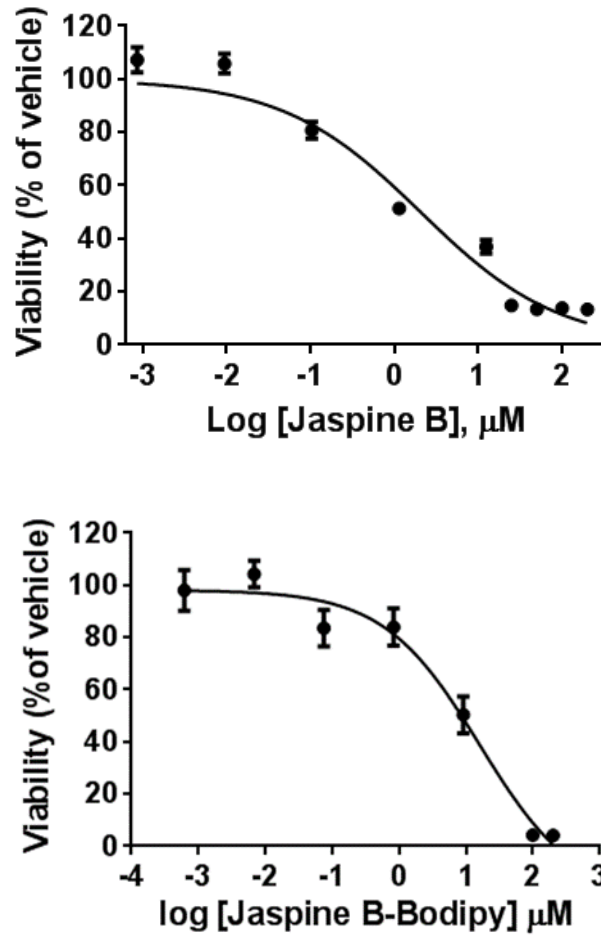

**Figure S1.** A549 cells were treated with different concentrations of JB (A) or Jaspine B-Bodipy (B) for 24 h and cell viability was assessed with 3-(4,5-dimethylthiazol-2-yl)-2,5-diphenyl tetrazolium bromide (MTT). Results are the mean  $\pm$  SD of three experiments performed in triplicate and are expressed as the percentage of the viability compared to the control. Data analysis using the Log(inhibitor) vs. response - variable slope (four parameters) equation (GraphPad Prism) afforded a CC<sub>50</sub> of 2.05  $\mu\text{M}$  for JB and of 16  $\mu\text{M}$  for Jaspine B-Bodipy.

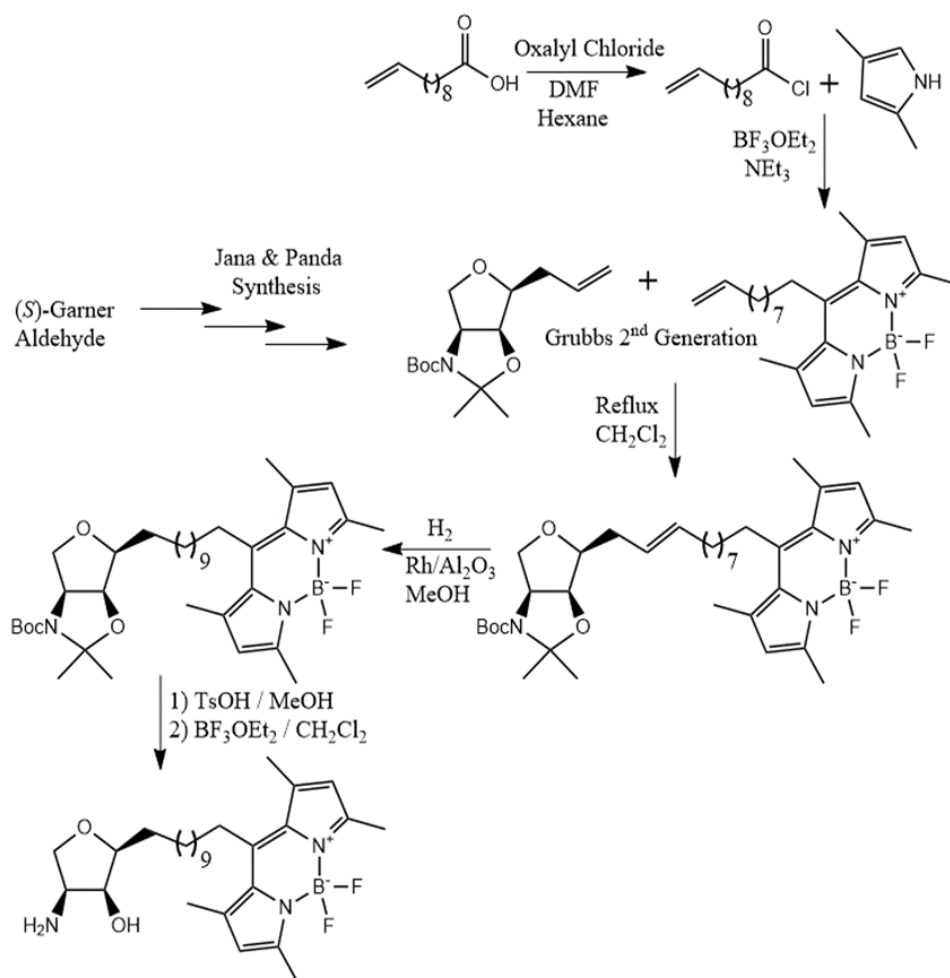

**Figure S2.** Chemical synthesis of Jaspine B-Bodipy. BF<sub>3</sub>OEt<sub>2</sub>, boron trifluoride diethyl etherate; DMF, dimethyl formamide; NEt<sub>3</sub>, Triethylamine; TsOH, p-toluenesulfonic acid. Jana, A.K.; Panda, G. Ref. 1: Stereoselective synthesis of Jaspine B and its C2 epimer from Garner aldehyde. RSC Adv.**2013**, 3, 16795–16801, doi:10.1039/c3ra41778f.

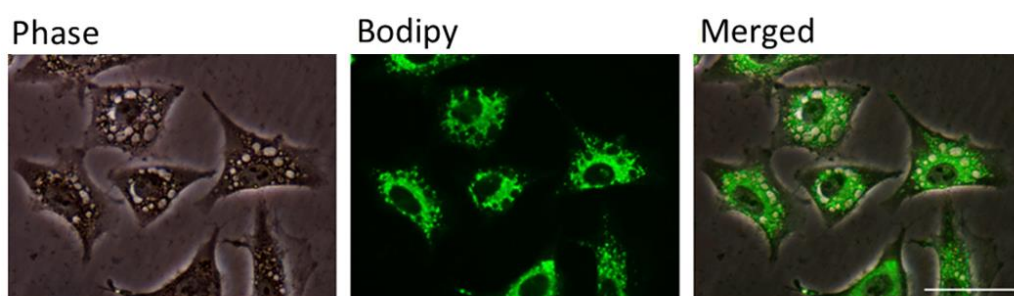

**Figure S3.** Induction of cell vacuolization by JB-Bodipy. A549 cells treated with 30  $\mu$ M JB-Bodipy for 2 h and were visualized by Fluorescence microscopy. Scale bar: 50  $\mu$ m. Images are representative of six separate experiments.

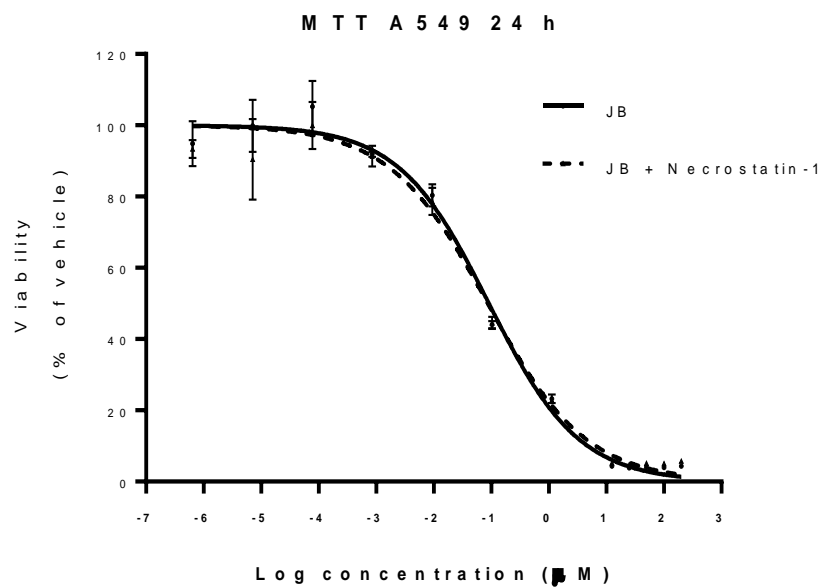

**Figure S4.** Jaspine B (JB) does not cause cell death by necrosis in A549 cells. A549 cells were treated with different concentrations of JB for 24 h after a 1-hour pre-incubation of 50  $\mu$ M Necrostatin-1. Results are the mean  $\pm$  SD of two experiments in triplicate ( $P > 0.05$ ).

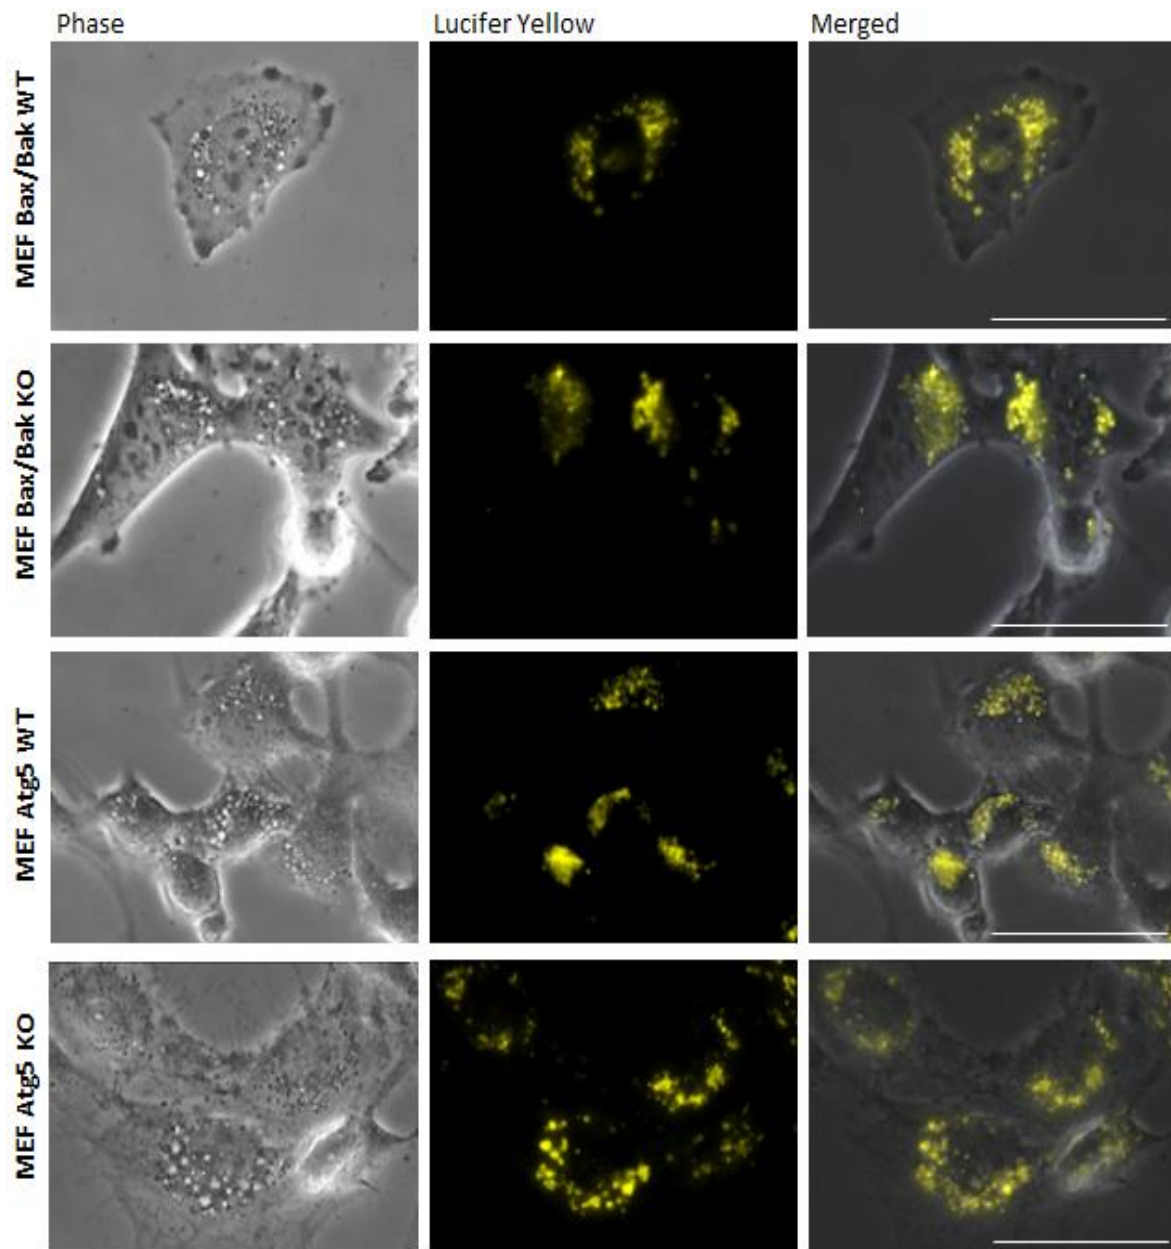

**Figure S5.** Vacuoles induced by Jaspine B (JB) in different murine cell lines are originated by macropinocytosis. Bcl-2-associated X protein<sup>-/-</sup>/Bcl-2-antagonist/killer 1<sup>-/-</sup> (BAX/BAK KO), autophagy related gene 5<sup>-/-</sup> (Atg5 KO) and Atg5<sup>+/+</sup> (Atg5 WT) mouse embryonic fibroblasts (MEF) were treated with 5  $\mu$ M JB and 0.5 mg/ml of Lucifer yellow (LY) and incorporation of LY in the vacuoles induced by JB was evaluated 4 h later by phase microscopy. Images are representative of two experiments. Scale bar: 50  $\mu$ m.
